# Supplementary material for: HDX-MS reveals nucleotide-dependent, anti-correlated opening and closure of SecA and SecY channels of the bacterial translocon
Source: eLife journal article supplement (doi:10.7554/elife.47402), 2019-07-10
Supplement: supp [file elife-47402-supp-v1.zip]

Archive with 7 entries (7 files):
- elife_poa_e47402_Transparent_Reporting_File.pdf
- elife_poa_e47402_Figure_2_figure_supplement_1.docx
- elife_poa_e47402_Figure_2_figure_supplement_3.docx
- elife_poa_e47402_Supplementary_file_2.pdf
- elife_poa_e47402_Supplementary_file_1.pdf
- elife_poa_e47402_Figure_3_figure_supplement_1.docx
- elife_poa_e47402_Figure_2_figure_supplement_2.docx
