# Supplementary material for: HDX-MS reveals nucleotide-dependent, anti-correlated opening and closure of SecA and SecY channels of the bacterial translocon
Source: eLife journal article supplement (doi:10.7554/elife.47402), 2019-07-10
Supplement: supp [file elife-47402-supp-v1.zip › elife_poa_e47402_Figure_2_figure_supplement_3.docx]

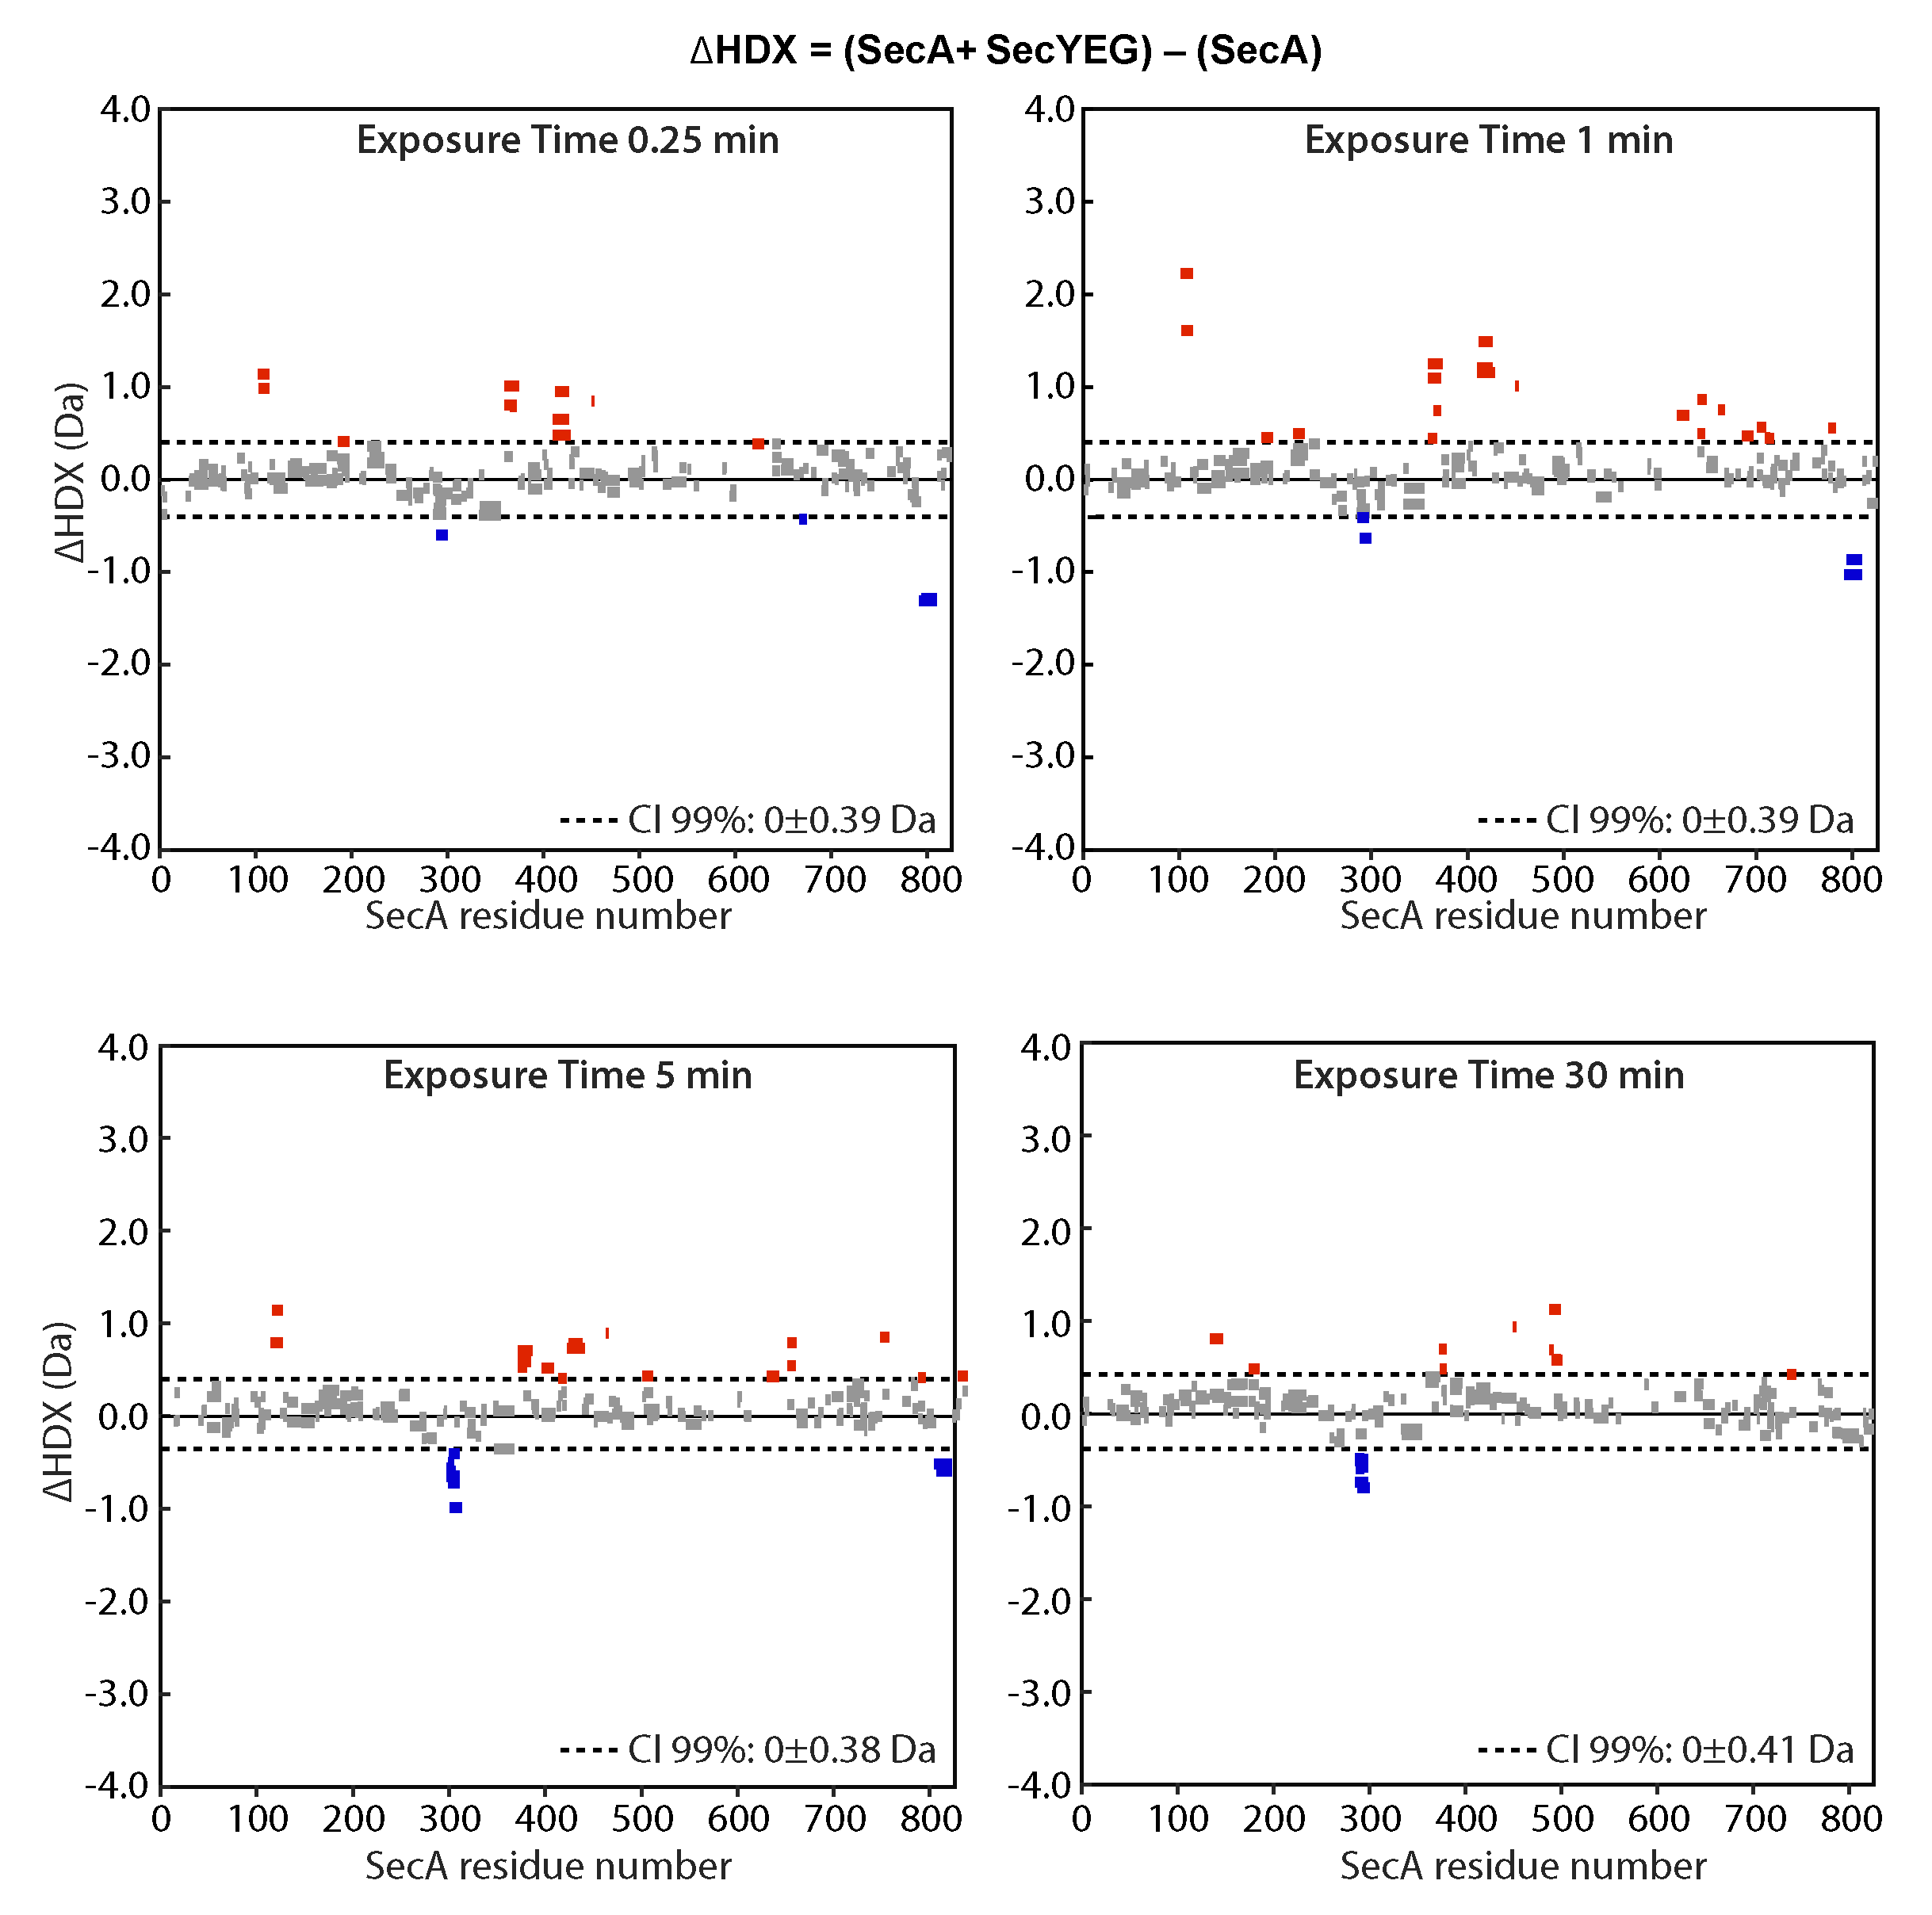


**Figure 2-figure supplement 3.** Impact of SecYEG binding on SecA.Wood’s plots comparing the relative deuterium uptake of SecA upon interaction with SecYEG (present in excess) at 15 seconds, 1, 5 or 30 minutes. Results indicate an overall deprotection, hence destabilisation of SecA upon SecYEG binding.
