# Supplementary material for: HDX-MS reveals nucleotide-dependent, anti-correlated opening and closure of SecA and SecY channels of the bacterial translocon
Source: eLife journal article supplement (doi:10.7554/elife.47402), 2019-07-10
Supplement: supp [file elife-47402-supp-v1.zip › elife_poa_e47402_Figure_3_figure_supplement_1.docx]

**
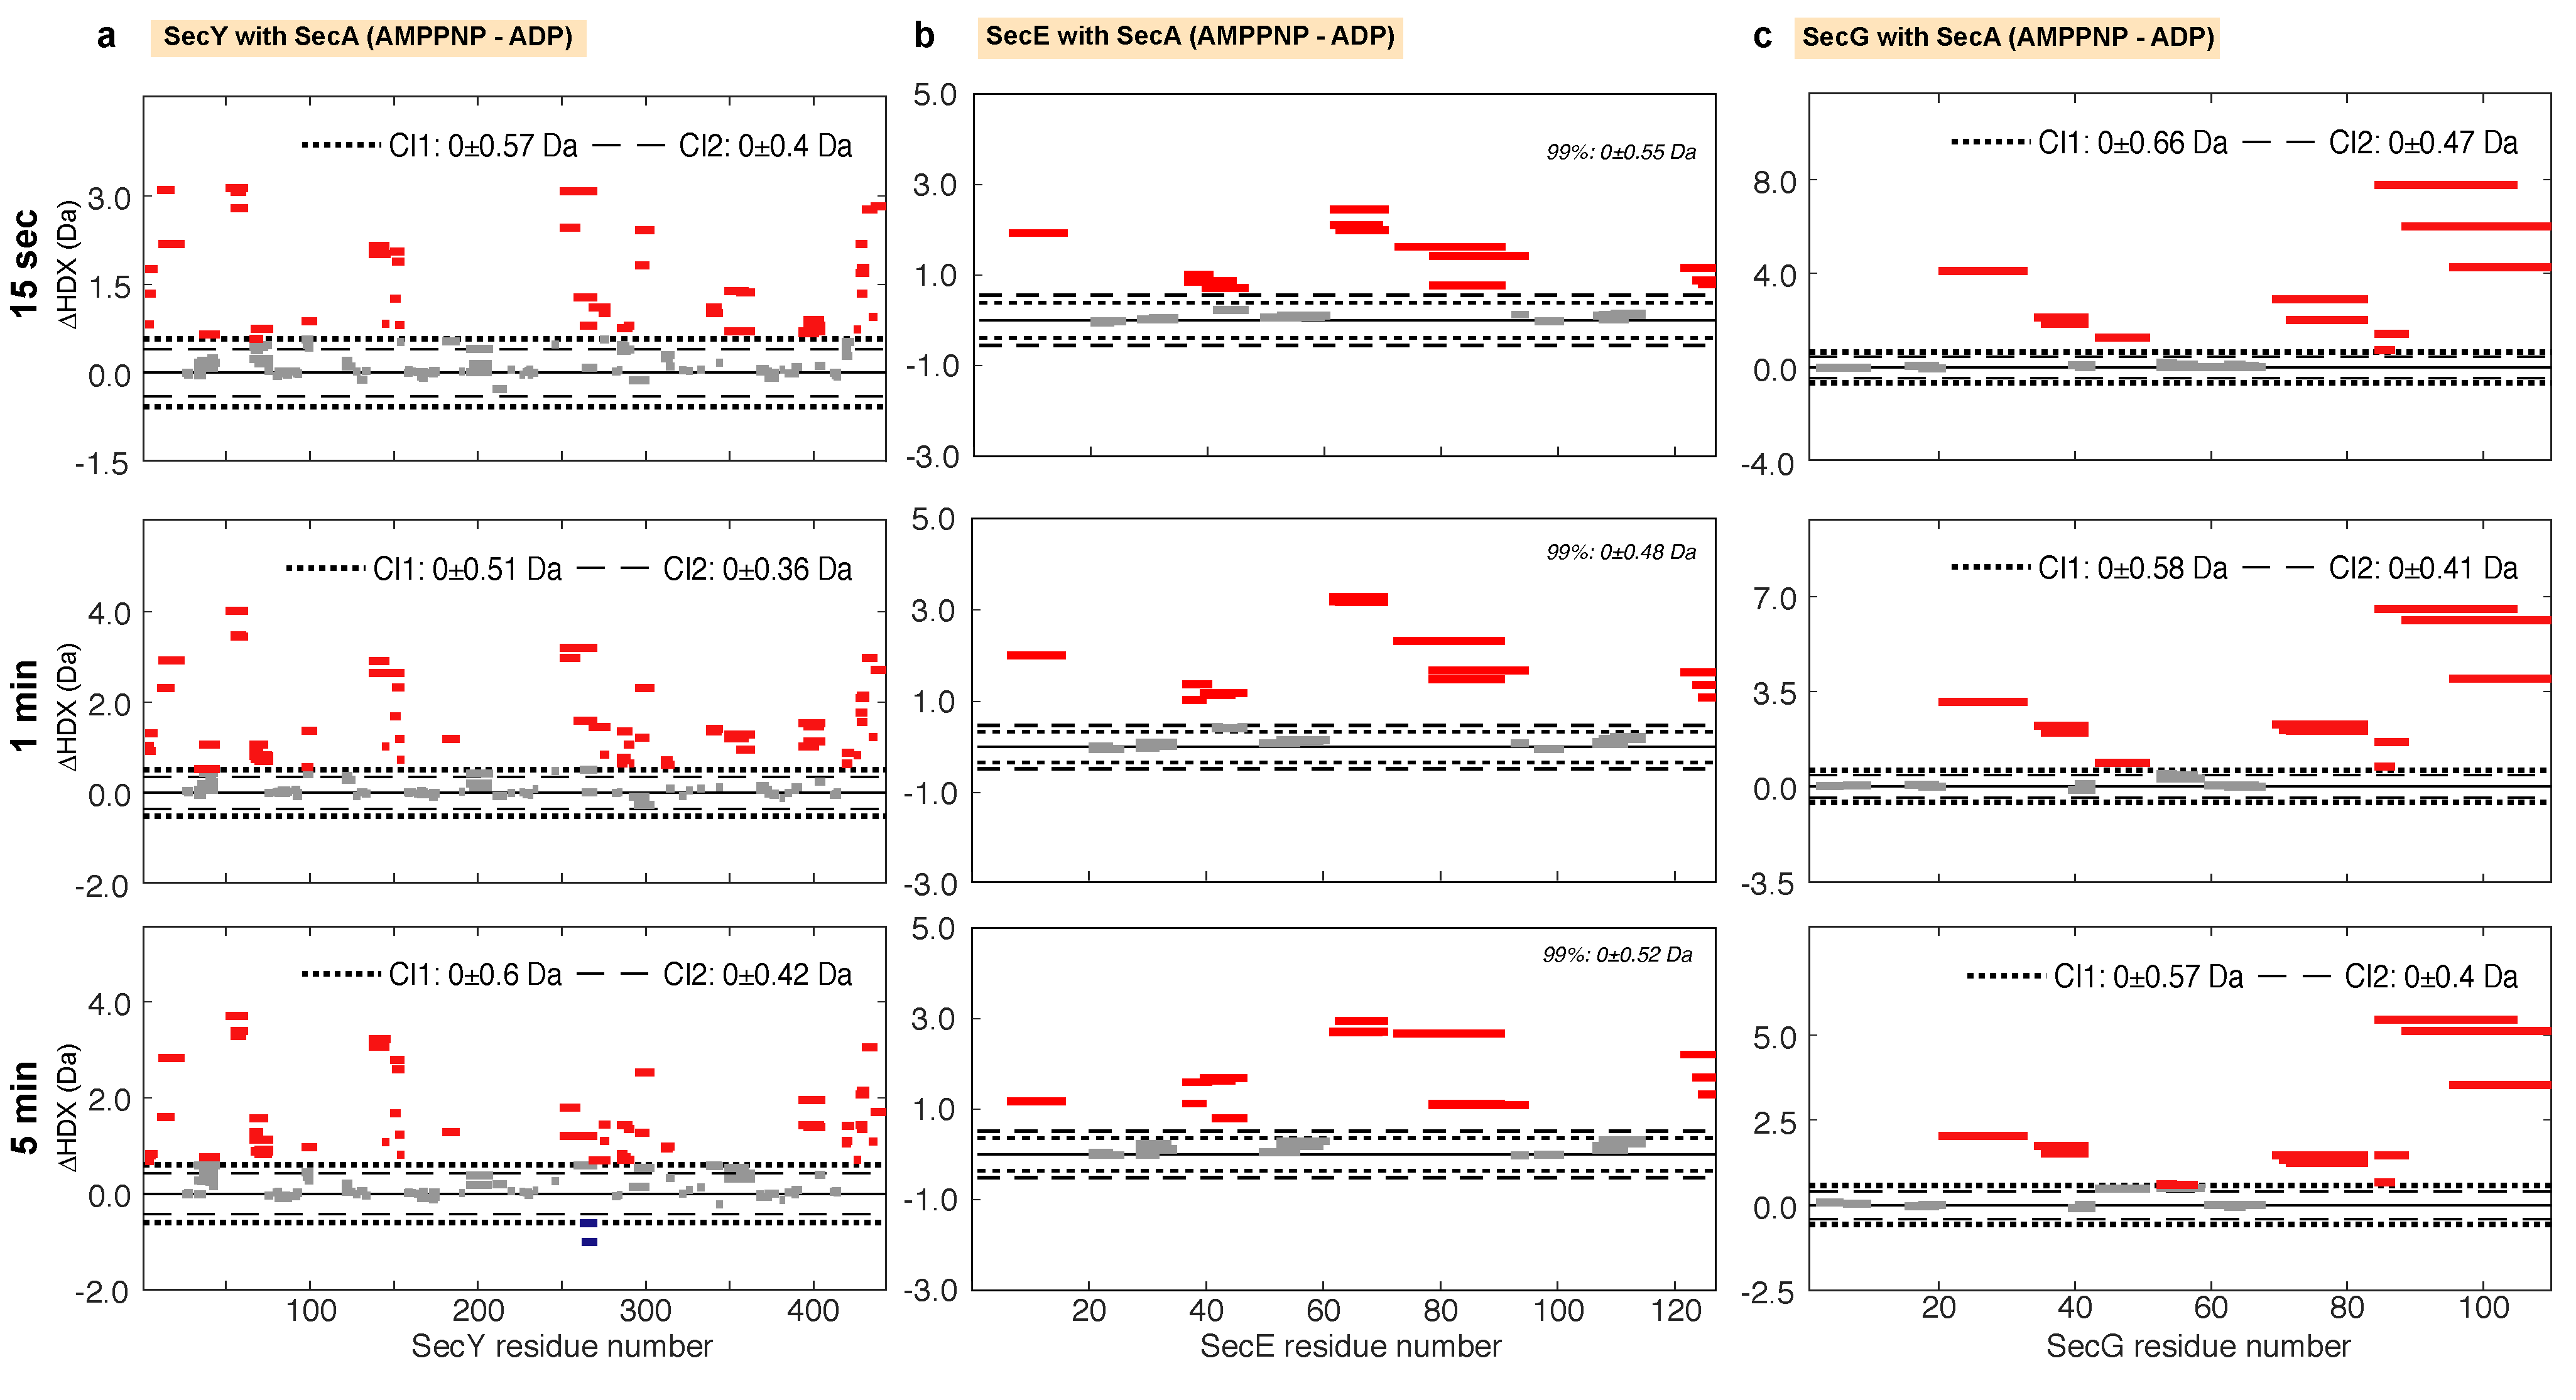
**

**Figure 3-figure supplement 1.** Wood’s plots comparing the relative deuterium uptake of SecYEG while bound to SecA (AMPPNP-ADP), showing: (a) SecY (b) SecE and (c) SecG after incubation at 25°C in deuterated solvent for 15 seconds, 1, or 5 minutes. The dotted lines represent the 99% confidence interval, which indicates the level of difference of deuterium uptake between the two compared states is statistically significant. Bars represent individual peptides. Bar length corresponds to peptide size. Red and blue coloured bars indicate statistically significant deprotected or protected peptides, respectively.
