# Supplementary material for: HDX-MS reveals nucleotide-dependent, anti-correlated opening and closure of SecA and SecY channels of the bacterial translocon
Source: eLife journal article supplement (doi:10.7554/elife.47402), 2019-07-10
Supplement: supp [file elife-47402-supp-v1.zip › elife_poa_e47402_Supplementary_file_1.pdf]

**Supplementary file 1A. HDX data summary table for  $\Delta\text{HDX} = (\text{SecA}^{\text{AMPPNP}}) - (\text{SecA}^{\text{ADP}})$ .** Data is presented in **Figure 2b**. Mass spectrometry raw data are deposited in the ProteomeXchange Consortium via the PRIDE database.

| $\Delta\text{HDX} = (\text{SecA}^{\text{AMPPNP}}) - (\text{SecA}^{\text{ADP}})$ |                                                                    |                           |
|---------------------------------------------------------------------------------|--------------------------------------------------------------------|---------------------------|
|                                                                                 | <b>SecA<sup>AMPPNP</sup></b>                                       | <b>SecA<sup>ADP</sup></b> |
| <b>HDX reaction details</b>                                                     | 20 mM Tris pH 8, 2 mM MgCl <sub>2</sub> , 50 mM KCl, and 0.02% DDM |                           |
| <b>HDX time course (min)</b>                                                    | 0.25, 1, 5 and 30 minutes                                          |                           |
| <b>Back-exchange (mean/IQR)</b>                                                 | ND                                                                 |                           |
| <b>Number of peptides</b>                                                       | 215                                                                | 215                       |
| <b>Sequence coverage</b>                                                        | 81.8                                                               | 81.8                      |
| <b>Average peptide length / Redundancy</b>                                      | 2.7                                                                | 2.7                       |
| <b>Replicates (biological or technical)</b>                                     | 3 (technical)                                                      | 3 (technical)             |
| <b>Repeatability (average SD)</b>                                               | 0.072                                                              | 0.07                      |
| <b>Significant differences in 30 min <math>\Delta\text{HDX}^{**}</math></b>     | CI 99% = $0 \pm 44$ Da                                             |                           |

\*\* To compare significant differences, a T-test with  $\alpha=0.01$  was used. Only peptides which satisfied a  $\Delta\text{HDX}$  confidence interval of 99 % were considered significant.

**Supplementary file 1B. HDX data summary table for  $\Delta\text{HDX} = (\text{SecA}^{\text{AMPPNP}} + \text{SecYEG}) - (\text{SecA}^{\text{ADP}} + \text{SecYEG})$ .** Data is presented in **Figure 2c**. Mass spectrometry raw data are deposited in the ProteomeXchange Consortium via the PRIDE database.

| $\Delta\text{HDX} = (\text{SecA}^{\text{AMPPNP}} + \text{SecYEG}) - (\text{SecA}^{\text{ADP}} + \text{SecYEG})$ * |                                                                    |                                     |
|-------------------------------------------------------------------------------------------------------------------|--------------------------------------------------------------------|-------------------------------------|
|                                                                                                                   | <b>SecA<sup>AMPPNP</sup> (+ SecYEG)</b>                            | <b>SecA<sup>ADP</sup> (+SecYEG)</b> |
| <b>HDX reaction details</b>                                                                                       | 20 mM Tris pH 8, 2 mM MgCl <sub>2</sub> , 50 mM KCl, and 0.02% DDM |                                     |
| <b>HDX time course (min)</b>                                                                                      | 0.25, 1, 5 and 30 minutes                                          |                                     |
| <b>Back-exchange (mean/IQR)</b>                                                                                   | ND                                                                 |                                     |
| <b>Number of peptides</b>                                                                                         | 215                                                                | 215                                 |
| <b>Sequence coverage</b>                                                                                          | 81.8                                                               | 81.8                                |
| <b>Average peptide length / Redundancy</b>                                                                        | 2.7                                                                | 2.7                                 |
| <b>Replicates (biological or technical)</b>                                                                       | 3 (technical)                                                      | 3 (technical)                       |
| <b>Repeatability (average SD)</b>                                                                                 | 0.064                                                              | 0.072                               |
| <b>Significant differences in 30 min <math>\Delta\text{HDX}^{**}</math></b>                                       | CI 99% = $0 \pm 41$ Da                                             |                                     |

\* SecYEG were in excess (mixture of bound and unbound, therefore data not used).

\*\* To compare significant differences, a T-test with  $\alpha=0.01$  was used. Only peptides which satisfied a  $\Delta\text{HDX}$  confidence interval of 99 % were considered significant.
