# Supplementary material for: HDX-MS reveals nucleotide-dependent, anti-correlated opening and closure of SecA and SecY channels of the bacterial translocon
Source: eLife journal article supplement (doi:10.7554/elife.47402), 2019-07-10
Supplement: supp [file elife-47402-supp-v1.zip › elife_poa_e47402_Supplementary_file_2.pdf]

**Supplementary file 2. HDX data summary table for  $\Delta\text{HDX} = (\text{SecYEG} + \text{SecA}^{\text{AMPPNP}}) - (\text{SecYEG} + \text{SecA}^{\text{ADP}})$ .** Data is presented in **Figure 3**. Mass spectrometry raw data are deposited in the ProteomeXchange Consortium via the PRIDE database.

| $\Delta\text{HDX} = (\text{SecYEG} + \text{SecA}^{\text{AMPPNP}}) - (\text{SecYEG} + \text{SecA}^{\text{ADP}})^*$ |                                                                    |                                    |
|-------------------------------------------------------------------------------------------------------------------|--------------------------------------------------------------------|------------------------------------|
|                                                                                                                   | <b>SecY (+ SecA<sup>AMPPNP</sup>)</b>                              | <b>SecY (+ SecA<sup>ADP</sup>)</b> |
| <b>HDX reaction details</b>                                                                                       | 20 mM Tris pH 8, 2 mM MgCl <sub>2</sub> , 50 mM KCl, and 0.02% DDM |                                    |
| <b>HDX time course (min)</b>                                                                                      | 0.25, 1, 5 and 30 minutes                                          |                                    |
| <b>Back-exchange (mean/IQR)</b>                                                                                   | ND                                                                 |                                    |
| <b>Number of peptides</b>                                                                                         | 137                                                                | 137                                |
| <b>Sequence coverage</b>                                                                                          | 91.6                                                               | 91.6                               |
| <b>Average peptide length / Redundancy</b>                                                                        | 2.91                                                               | 2.91                               |
| <b>Replicates (biological or technical)</b>                                                                       | 3 (technical)                                                      | 3 (technical)                      |
| <b>Repeatability (average SD)</b>                                                                                 | 0.099                                                              | 0.093                              |
| <b>Significant differences in 30 min <math>\Delta\text{HDX}^{**}</math></b>                                       | CI 99% = $0 \pm 62$ Da                                             |                                    |
|                                                                                                                   | <b>SecE (+ SecA<sup>AMPPNP</sup>)</b>                              | <b>SecE (+ SecA<sup>ADP</sup>)</b> |
| <b>HDX reaction details</b>                                                                                       | 20 mM Tris pH 8, 2 mM MgCl <sub>2</sub> , 50 mM KCl, and 0.02% DDM |                                    |
| <b>HDX time course (min)</b>                                                                                      | 0.25, 1, 5 and 30 minutes                                          |                                    |
| <b>Back-exchange (mean/IQR)</b>                                                                                   | ND                                                                 |                                    |
| <b>Number of peptides</b>                                                                                         | 31                                                                 | 31                                 |
| <b>Sequence coverage</b>                                                                                          | 79.4                                                               | 79.4                               |
| <b>Average peptide length / Redundancy</b>                                                                        | 2.34                                                               | 2.34                               |
| <b>Replicates (biological or technical)</b>                                                                       | 3 (technical)                                                      | 3 (technical)                      |
| <b>Repeatability (average SD)</b>                                                                                 | 0.099                                                              | 0.079                              |
| <b>Significant differences in 30 min <math>\Delta\text{HDX}^{**}</math></b>                                       | CI 99% = $0 \pm 63$ Da                                             |                                    |
|                                                                                                                   | <b>SecG (+ SecA<sup>AMPPNP</sup>)</b>                              | <b>SecG (+ SecA<sup>ADP</sup>)</b> |
| <b>HDX reaction details</b>                                                                                       | 20 mM Tris pH 8, 2 mM MgCl <sub>2</sub> , 50 mM KCl, and 0.02% DDM |                                    |
| <b>HDX time course (min)</b>                                                                                      | 0.25, 1, 5 and 30 minutes                                          |                                    |
| <b>Back-exchange (mean/IQR)</b>                                                                                   | ND                                                                 |                                    |
| <b>Number of peptides</b>                                                                                         | 25                                                                 | 25                                 |
| <b>Sequence coverage</b>                                                                                          | 95.5                                                               | 95.5                               |
| <b>Average peptide length / Redundancy</b>                                                                        | 2.11                                                               | 2.11                               |
| <b>Replicates (biological or technical)</b>                                                                       | 3 (technical)                                                      | 3 (technical)                      |
| <b>Repeatability (average SD)</b>                                                                                 | 0.101                                                              | 0.112                              |
| <b>Significant differences in 30 min <math>\Delta\text{HDX}^{**}</math></b>                                       | CI 99% = $0 \pm 64$ Da                                             |                                    |

\* SecA is in excess (mixture of bound and unbound, therefore data not used).

\*\* To compare significant differences, a T-test with  $\alpha=0.01$  was used. Only peptides which satisfied a  $\Delta\text{HDX}$  confidence interval of 99 % were considered significant
