# Supplementary material for: HDX-MS reveals nucleotide-dependent, anti-correlated opening and closure of SecA and SecY channels of the bacterial translocon
Source: eLife journal article supplement (doi:10.7554/elife.47402), 2019-07-10
Supplement: supp [file elife_poa_e47402_Figure_2_figure_supplement_1.docx]

**
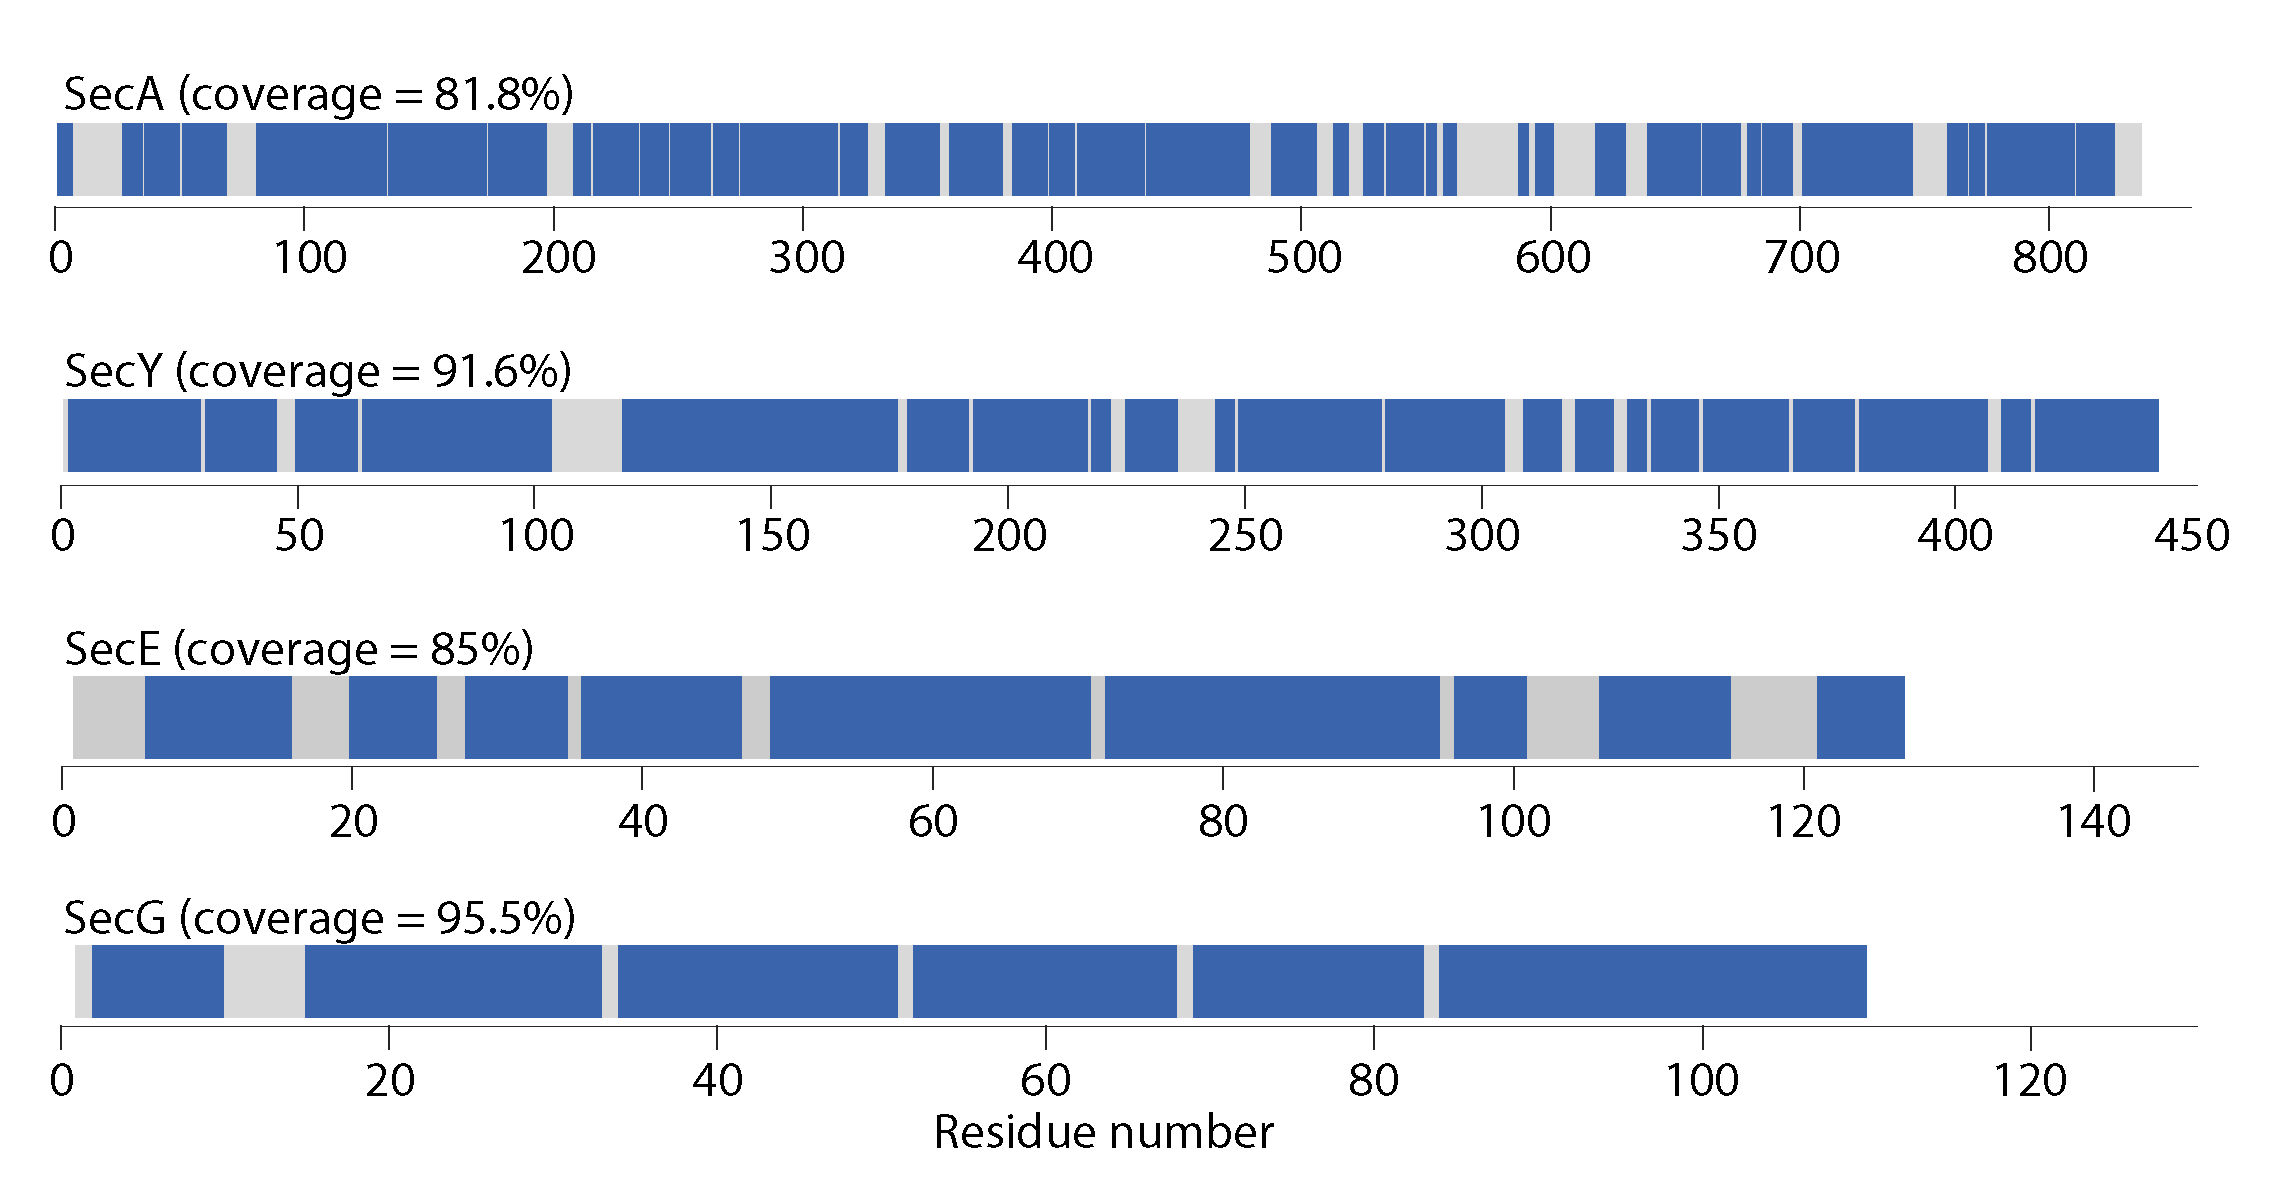
**

**Figure 2-figure supplement 1.** Linear protein coverage maps forSecA, SecY, SecE and SecG. Maps were generated using Deuteros25.
